# Supplementary material for: Ion transporter gene expression is linked to the thermal sensitivity of calcification in the reef coral Stylophora pistillata
Source: PubMed Central journal article supplement (PMC6904480; doi:10.1038/s41598-019-54814-7), 2019-12-10
Supplement: 41598_2019_54814_MOESM1_ESM.pdf [file 41598_2019_54814_MOESM1_ESM.pdf]

**Supplementary information**

**Ion transporter gene expression is linked to the thermal sensitivity  
of calcification in the reef coral *Stylophora pistillata***

**Bernardet C<sup>1,2</sup>, Tambutté E<sup>1</sup>, Techer N<sup>1</sup>, Tambutté S<sup>1</sup> and Venn AA<sup>1\*</sup>**

1. Centre Scientifique de Monaco, Marine Biology Department, 8 Quai Antoine 1<sup>er</sup>,  
Monaco 98000
2. Sorbonne Université, Collège Doctoral, F-75005 Paris, France

\*Corresponding authors email: [avenn@centrescientifique.mc](mailto:avenn@centrescientifique.mc)

Telephone: + 377 97 77 44 72

Supplementary Table 1. List of *S. pistillata* ion transport genes with RT-PCR primers and product size. Further information can be obtained from the Cnidarian Database [www.data.centrescientifique.mc](http://www.data.centrescientifique.mc) (Karako Lampert et al. 2014).

| Target gene              | Reference                         | Real-time PCR primers     |                          | Product size          |        |
|--------------------------|-----------------------------------|---------------------------|--------------------------|-----------------------|--------|
| Ca <sup>2+</sup> channel | Zoccola <i>et al.</i> (1999)      | F                         | TGCTACAAGATCGCCACCAACAC  | 82 pb                 |        |
|                          |                                   | R                         | TCAGCCGCCAGCAGAATACTACTC |                       |        |
| NHE                      | Capasso <i>et al.</i> (in prep)   | F                         | TCATTCTCCTTGGCTGTTTTACTG | 138 pb                |        |
|                          |                                   | R                         | CATGAAGAATCCGCACAAGAGGTT |                       |        |
| PMCA1                    | Zoccola <i>et al.</i> (2004)      | F                         | CCAAAACCTCCCAAAACCTTCCT  | 131 pb                |        |
|                          |                                   | R                         | GACCCCTCGCAATCCTCTGG     |                       |        |
| PMCA2                    | Wang <i>et al.</i> (in prep)      | F                         | GTACTGGCAAGAGCAACACC     | 125 pb                |        |
|                          |                                   | R                         | AAGACTGGCCATCATTAGC      |                       |        |
| PMCA3                    |                                   | F                         | TCACTGGAGATCCGCGTTTTTACA | 140 pb                |        |
|                          |                                   | R                         | ACCGGTTTGCTTTGGGAGACATT  |                       |        |
| SpisSLC4β                | Zoccola <i>et al.</i> (2015)      | F                         | CCAATGTTGCGTTCGGTAGTCTTT | 143 pb                |        |
|                          |                                   | R                         | GCCCTGTAGCGCCAATAATAATCA |                       |        |
| SpisSLC4γ                |                                   | F                         | CTTGGAGGGCTGTTTCTTGAT    | 152 pb                |        |
|                          |                                   | R                         | TATTTTCCGCTCCCTACCCTGTTC |                       |        |
| SpisSLC4δ                |                                   | F                         | TCTTGCTGGTGAATTGGTGGAGT  | 150 pb                |        |
|                          |                                   | R                         | TAAACGGAATGGCATGTAGTCAAG |                       |        |
| SpisSLC4ε                |                                   | F                         | GGCTGCCTACCCACCAAACCA    | 113 pb                |        |
|                          |                                   | R                         | GGGGCAAATCCAAATCCACATAG  |                       |        |
| SpisSLC26α               |                                   | F                         | GCGAAATTTCTGCCATCTA      | 133 pb                |        |
|                          |                                   | R                         | TCGCCACGGTTATCCCTCCTGCTA |                       |        |
| SpisSLC26β               |                                   | F                         | CATCGCGGCACTTGCTGTAG     | 159 pb                |        |
|                          |                                   | R                         | GTCCATAACGCGGTGCCTTCTGTC |                       |        |
| SpisSLC26γ               |                                   | F                         | GATTGCCGCGTCATTTCACTG    | 131 pb                |        |
|                          |                                   | R                         | ATTCCCTGCATTTCCCCTGTAA   |                       |        |
| SpisCA1                  |                                   | Moya <i>et al.</i> (2008) | F                        | GGAGGGACCCGACACGTGGAA | 110 pb |
|                          |                                   |                           | R                        | AGTCGGCAAGTCCCGGTTTCG |        |
| SpisCA2                  | Bertucci <i>et al.</i> (2011)     | F                         | TGCGGCCGAGTGACTGGAGA     | 91 pb                 |        |
|                          |                                   | R                         | CGCCACTGAGTTTAGCGCCTCC   |                       |        |
| SpisCA3                  | Del Prete <i>et al.</i> (2018)    | F                         | TGGCTCTGGTGGCCCAAATGGT   | 136 pb                |        |
|                          |                                   | R                         | TGCTGGGCACGGTGACAGAGGT   |                       |        |
| SpisCA4                  | Le Goff <i>et al.</i> 2016        | F                         | GGTGCCGCTTGTTTTAGCGCA    | 87 pb                 |        |
|                          |                                   | R                         | TCCGTTGCGCATGTCCCTGT     |                       |        |
| V-ATPase                 | Capasso <i>et al.</i> (in prep)   | F                         | GAGGAGTTTGATTTGGGGAAGTA  | 97 pb                 |        |
|                          |                                   | R                         | AGTCGCAAATAAGAGGCTGTGTT  |                       |        |
| L22                      | Karako Lampert <i>et al.</i> 2014 | F                         | TGATGTGCCATTGATCGTC      | 137 pb                |        |
|                          |                                   | R                         | CATAGGTAGCTTGTGCAGATG    |                       |        |
| 36B4                     | Moya <i>et al.</i> , 2008         | F                         | AACAAGGTGGCAGCCCCAGC     | 91 pb                 |        |
|                          |                                   | R                         | GTCTTCTCGGGACCCAGGCCA    |                       |        |

Supplementary Table 2. Results of two-way ANOVA tests on the effect of temperature and day/night on calcification and respiration rates (Figure 1A and B) and the results of one-way ANOVA tests on the effect of temperature on photosynthetic rate (Figure 1C) and symbiont density (Figure 1D).

| Variable            | Effect             | df     | F       | P         | Post-hoc                                      |
|---------------------|--------------------|--------|---------|-----------|-----------------------------------------------|
| Calcification rate  | Temperature        | 9, 118 | 70.203  | < 0.00001 | See table S3                                  |
|                     | Time               | 1, 118 | 285.72  | < 0.00001 | See table S3                                  |
|                     | Temperature x Time | 9, 118 | 7.386   | < 0.00001 | See table S3                                  |
| Respiration rate    | Temperature        | 9, 124 | 36.381  | < 0.00001 | See table S4                                  |
|                     | Time               | 1, 124 | 115.537 | < 0.00001 | See table S4                                  |
|                     | Temperature x Time | 9, 124 | 2.292   | < 0.05    | See table S4                                  |
| Photosynthetic rate | Temperature        | 9, 62  | 18.72   | < 0.00001 | 21,23,25,27,29,31<br>> 21,27,19,32 ><br>17,33 |
| Symbiont density    | Temperature        | 4, 10  | 11.14   | < 0.001   | 25°C ≥ 31°C ≥<br>19°C > 17°C, 32°C            |

Supplementary Table 3. Results of post-hoc pairwise t tests on calcification rate. Letters (x and y) indicate statistical differences ( $p < 0.05$ ) with respect to 25 °C, and between night and day.

| Temperature | Time  | 25°C  |     | Difference between night / day |
|-------------|-------|-------|-----|--------------------------------|
|             |       | Night | Day |                                |
| 17°C        | Night | x     |     | -                              |
|             | Day   |       | x   |                                |
| 19°C        | Night | -     |     | -                              |
|             | Day   |       | x   |                                |
| 21°C        | Night | -     |     | y                              |
|             | Day   |       | x   |                                |
| 23°C        | Night | -     |     | y                              |
|             | Day   |       | x   |                                |
| 27°C        | Night | -     |     | y                              |
|             | Day   |       | -   |                                |
| 29°C        | Night | -     |     | y                              |
|             | Day   |       | x   |                                |
| 31°C        | Night | -     |     | y                              |
|             | Day   |       | -   |                                |
| 32°C        | Night | x     |     | y                              |

|      |       |   |   |   |
|------|-------|---|---|---|
|      | Day   |   | x |   |
| 33°C | Night | x |   | y |
|      | Day   |   | x |   |

Supplementary Table 4. Results of post-hoc pairwise t tests on respiration rate. Letters (x and y) indicate statistical differences ( $p < 0.05$ ) with respect to 25 °C, and between night and day.

| Temperature | Time  | 25°C  |     | Difference between night / day |
|-------------|-------|-------|-----|--------------------------------|
|             |       | Night | Day |                                |
| 17°C        | Night | x     |     | -                              |
|             | Day   |       | x   |                                |
| 19°C        | Night | x     |     | -                              |
|             | Day   |       | x   |                                |
| 21°C        | Night | x     |     | y                              |
|             | Day   |       | x   |                                |
| 23°C        | Night | x     |     | y                              |
|             | Day   |       | -   |                                |
| 27°C        | Night | -     |     | y                              |
|             | Day   |       | -   |                                |
| 29°C        | Night | -     |     | y                              |
|             | Day   |       | -   |                                |
| 31°C        | Night | -     |     | y                              |
|             | Day   |       | -   |                                |
| 32°C        | Night | x     |     | y                              |
|             | Day   |       | x   |                                |
| 33°C        | Night | x     |     | y                              |
|             | Day   |       | x   |                                |

Supplementary Table 5. Eigen values from descriptive discriminant analysis of transcellular transporter genes

|                       | DF1           | DF2           | DF3           | DF4    | DF5    |
|-----------------------|---------------|---------------|---------------|--------|--------|
| Eigen values          | 0.967         | 0.95          | 0.905         | 0.776  | 0.419  |
| Proportion            | <b>24.081</b> | <b>23.638</b> | <b>22.536</b> | 19.313 | 10.434 |
| Cumulative Proportion | <b>24.081</b> | <b>47.718</b> | <b>70.254</b> | 89.566 | 100    |

Supplementary Table 6. Discriminant variables from descriptive discriminant analysis of transcellular transporter genes

|                          | DF1      | DF2      | DF3      | DF4     | DF5      |
|--------------------------|----------|----------|----------|---------|----------|
| Ca <sup>2+</sup> channel | -1.25174 | -0.50275 | 0.82883  | 0.92    | 1.50667  |
| PMCA1                    | 1.49177  | 2.30532  | -2.37027 | 0.7289  | -3.0821  |
| PMCA2                    | 0.84803  | 0.53783  | 2.229    | -2.0158 | -4.70668 |
| PMCA3                    | -0.412   | 0.39785  | 1.07867  | -0.6077 | 1.01399  |
| NHE                      | -2.04806 | -1.61509 | -0.80468 | -1.4671 | -0.78038 |
| SpisSLC4 $\beta$         | 0.13748  | 0.39     | -0.57168 | 1.2192  | -3.02595 |
| SpisSLC4g                | -0.1545  | -0.51738 | 0.27089  | 3.0924  | 1.27347  |
| SpisSLC4 $\gamma$        | 0.55733  | 0.26041  | 0.22834  | -1.1867 | -1.45829 |
| SpisSLC4e                | 0.61186  | -0.91709 | 0.16733  | -1.0479 | 4.7902   |
| SpisSLC4 $\delta$        | 0.14967  | -0.02118 | -1.00771 | 1.0861  | -1.40355 |
| SpisSLC26b               | -0.02647 | 0.06913  | -0.23149 | 0.1728  | 0.12823  |
| SpisSLC4 $\epsilon$      | -0.41848 | -0.03035 | 0.69804  | 0.9642  | -0.71527 |
| SpisCA1                  | -0.58458 | -0.50437 | 1.3165   | -2.7138 | -0.08673 |
| SpisCA2                  | 0.19726  | 0.62296  | -0.3189  | 0.2463  | -1.87507 |
| SpisCA3                  | 0.77479  | 0.93835  | -1.31863 | 1.9029  | 0.03303  |
| SpisCA4                  | -1.0053  | -0.57662 | 0.2773   | -1.0983 | 1.76961  |
| V-ATPase                 | 0.23082  | -1.08646 | 0.07618  | -1.0984 | 6.54858  |

Supplementary Table 7. Results of three-way ANOVA tests on the effect of temperature (17, 25 and 32°C), time of day (day/nighttime) and gene identity on relative gene expressions (Figures 3 and 4 in main manuscript). Results of posthoc tests are given in main manuscript in Tables 1 and 2.

| Variable        | Effect                 | df      | F       | P         |
|-----------------|------------------------|---------|---------|-----------|
| gene expression | Temperature            | 2, 510  | 85.8017 | < 0,00001 |
|                 | Time                   | 1, 510  | 46.8169 | < 0,00001 |
|                 | Genes                  | 16, 510 | 4.1862  | < 0,00001 |
|                 | Temperature*Time       | 2, 510  | 12.3359 | < 0,00001 |
|                 | Temperature*Genes      | 32, 510 | 16.9948 | < 0,00001 |
|                 | Time*Genes             | 16, 510 | 4.0744  | < 0,00001 |
|                 | Temperature*Time*Genes | 32, 510 | 2.8592  | < 0,00001 |

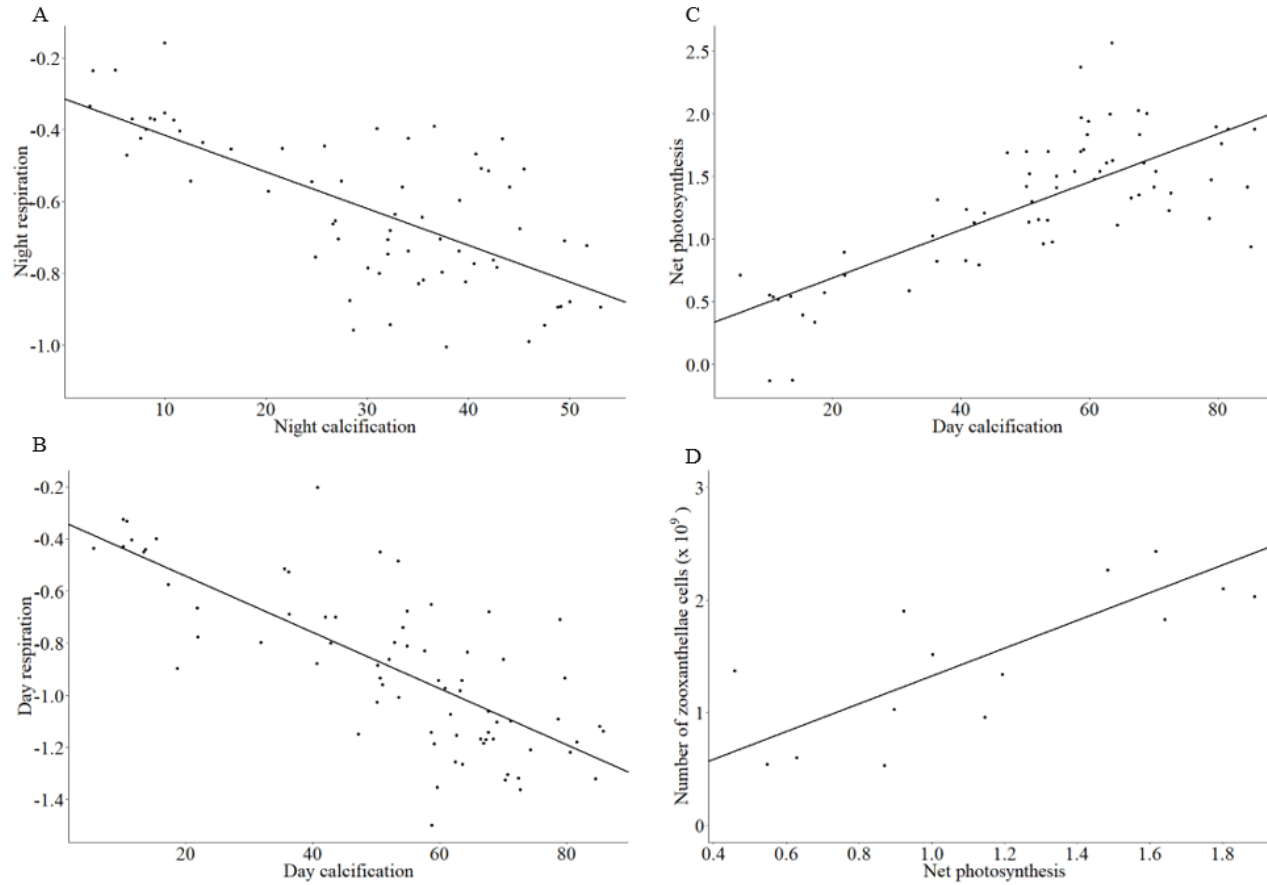

Supplementary Figure 1. Correlation of (A) night respiration to night calcification ( $p = 1.6 \cdot 10^{-10}$  and  $R^2 = 0.47$ ), (B) day respiration to day calcification ( $p = 3.1 \cdot 10^{-14}$  and  $R^2 = 0.56$ ), (C) net photosynthesis to day calcification ( $p = 3.1 \cdot 10^{-13}$  and  $R^2 = 0.56$ ), (D) symbiont density to net photosynthesis ( $p = 4.4 \cdot 10^{-4}$  and  $R^2 = 0.60$ ).

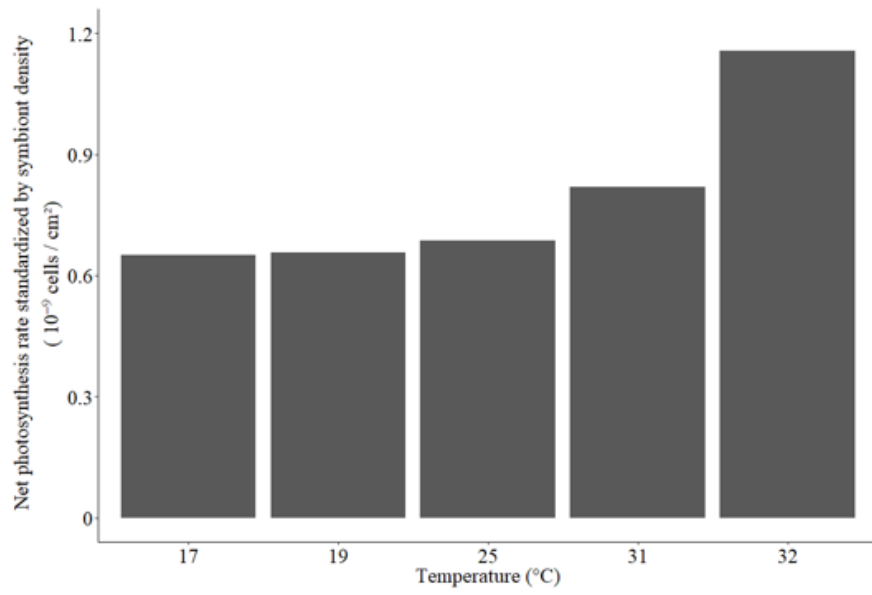

Supplementary Figure 2. Photosynthetic rate normalized to symbiont density.

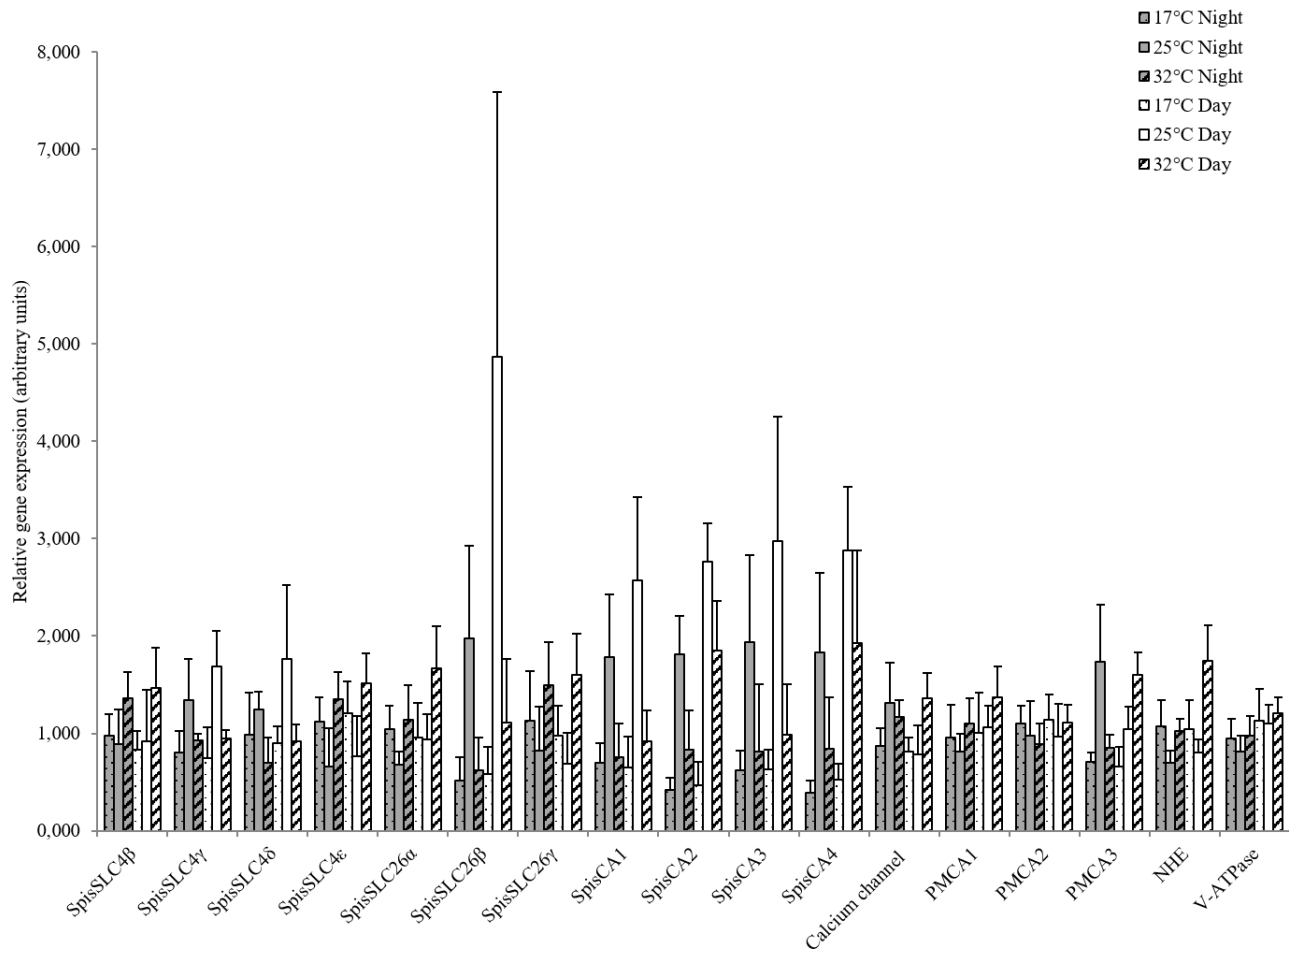

Supplementary Figure 3. Gene expression (mean  $\pm$ SD) of ion transport genes relative to geometric mean of expression of the reference genes L22 and 36B4. The same data is presented in the main manuscript as log<sub>10</sub> transformation plots in Figure 3 and 4 relative to 25°C and nighttime.



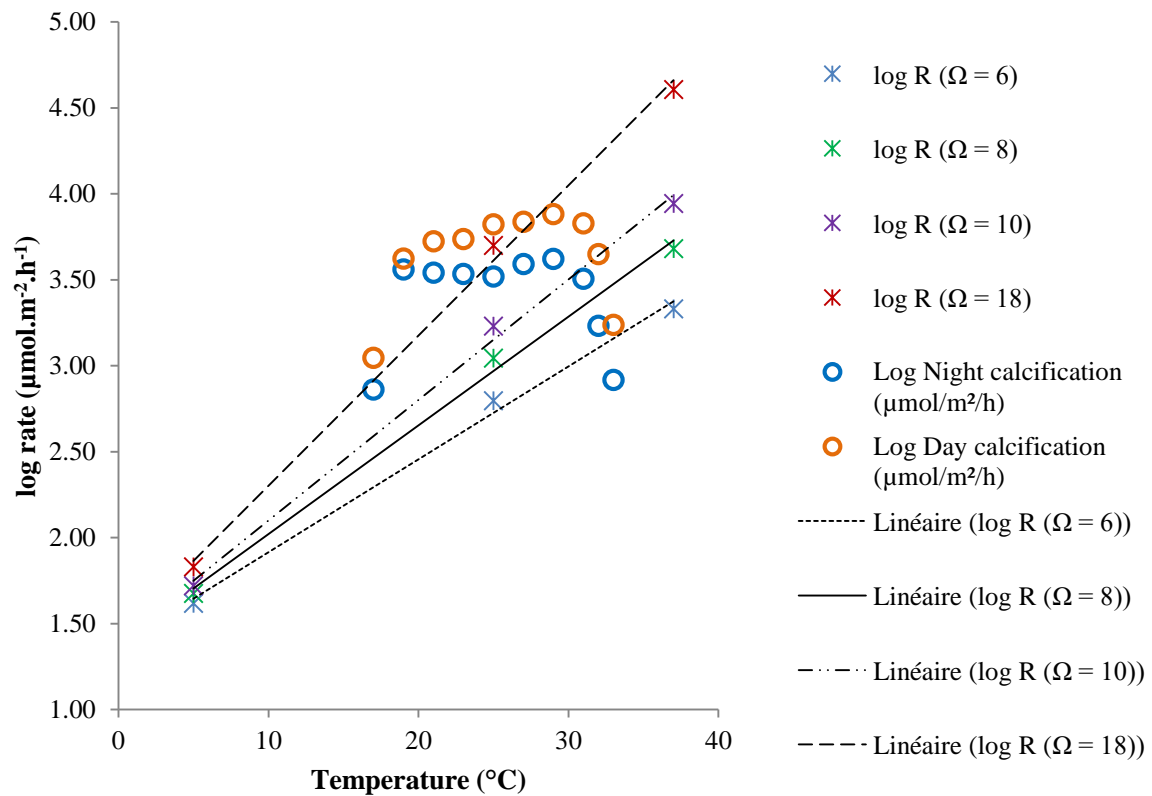

Supplementary Figure 4. Abiotic precipitation rate of aragonite as a function of aragonite saturation state at 5°C, 25°C and 37°C in seawater (modified from Burton and Walter, 1987), and precipitation rate of aragonite in *S. pistillata* from 17°C to 33°C during night (blue circles) and day (orange circles).

## References

- Bertucci A, Tambutté S, Supuran CT, Allemand D, Zoccola D (2011) A New Coral Carbonic Anhydrase in *Stylophora pistillata*. *Marine Biotechnology*, **13**, 992–1002.
- Del Prete S, Bua S, Zoccola D et al. (2018) Comparison of the Anion Inhibition Profiles of the  $\alpha$ -CA Isoforms (SpiCA1, SpiCA2 and SpiCA3) from the Scleractinian Coral *Stylophora pistillata*. *International Journal of Molecular Sciences*, **19**, 2128.
- Le Goff C, Ganot P, Zoccola D, Caminiti-Segonds N., Allemand D, and Tambutté S. (2016). Carbonic Anhydrases in Cnidarians: Novel Perspectives from the Octocorallian *Corallium rubrum*. *PloS ONE* 11(8): e0160368.  
<https://doi.org/10.1371/journal.pone.0160368>

Karako-Lampert S, Zoccola D, Salmon-Divon M et al. (2014) Transcriptome Analysis of the Scleractinian Coral *Stylophora pistillata* (ed Voolstra CR). *PLoS ONE*, **9**, e88615.

Laurent J1, Venn A, Tambutté É, Ganot P, Allemand D, Tambutté S. Regulation of intracellular pH in cnidarians: response to acidosis in *Anemonia viridis*. *FEBS J.* 2014 Feb;281(3):683-95. doi: 10.1111/febs.12614. Epub 2013 Dec 10.

Moya A, Tambutté S, Bertucci A et al. (2008) Carbonic anhydrase in the scleractinian coral *Stylophora pistillata*: Characterization, localization, and role in biomineralization. *Journal of Biological Chemistry*.

Zoccola D, Tambutté E, Kulhanek E, Puverel S, Scimeca JC, Allemand D, Tambutté S (2004) Molecular cloning and localization of a PMCA P-type calcium ATPase from the coral *Stylophora pistillata*. *Biochimica et Biophysica Acta - Biomembranes*.

Zoccola D, Ganot P, Bertucci A et al. (2015) Bicarbonate transporters in corals point towards a key step in the evolution of cnidarian calcification. *Scientific Reports*, **5**, 9983.

Zoccola D, Tambutté E, Sénégas-Balas F, Michiels J-F, Failla J-P, Jaubert J, Allemand D (1999) Cloning of a calcium channel  $\alpha 1$  subunit from the reef-building coral, *Stylophora pistillata*. *Gene*, **227**, 157–167.
